# Supplementary material for: Autophagy and apoptosis: studies on the effects of bisthiosemicarbazone copper(ii) complexes on p53 and p53-null tumour cell lines
Source: Royal Society of Chemistry journal article supplement (doi:10.1039/c6mt00170j), 2016-01-01
Supplement: c6mt00170j1.pdf [file c6mt00170j1.pdf]

## **SUPPLEMENTARY MATERIALS**

**Fig. S1 Cycle**

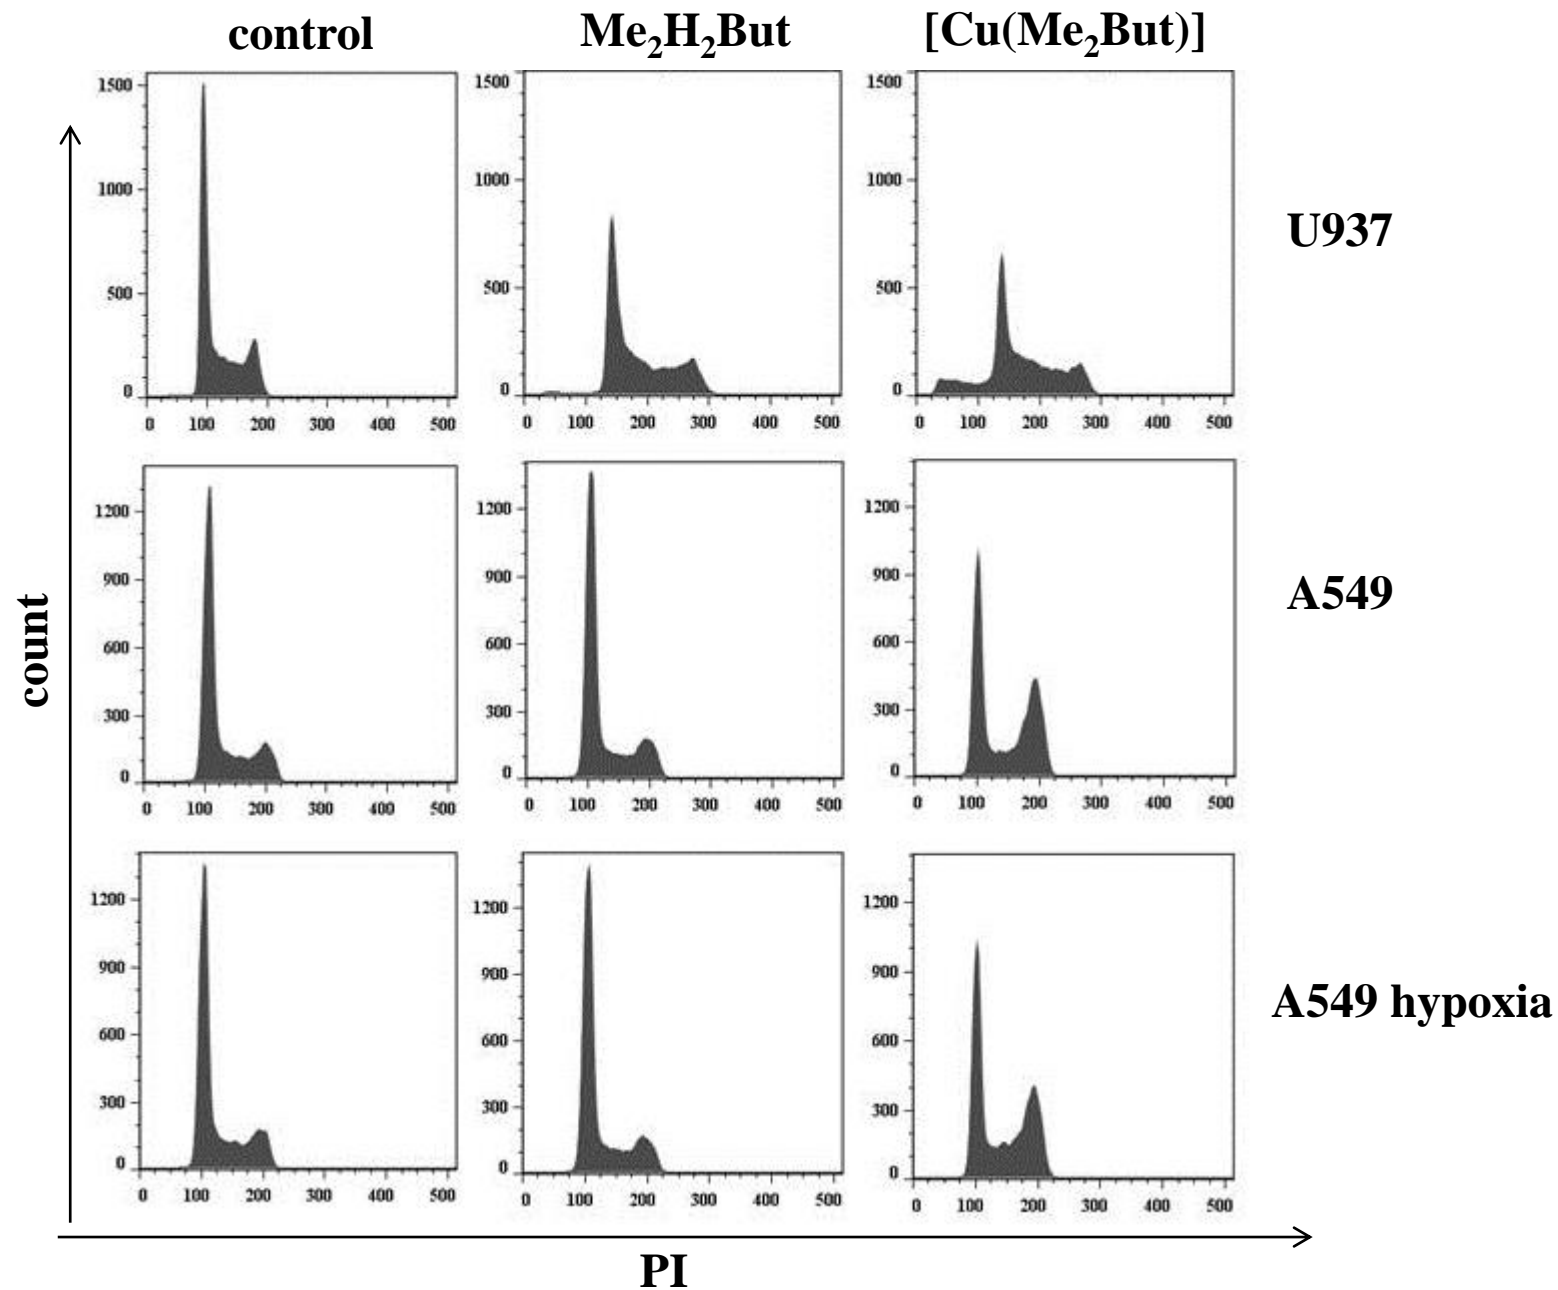

**Fig S2 Cycle**

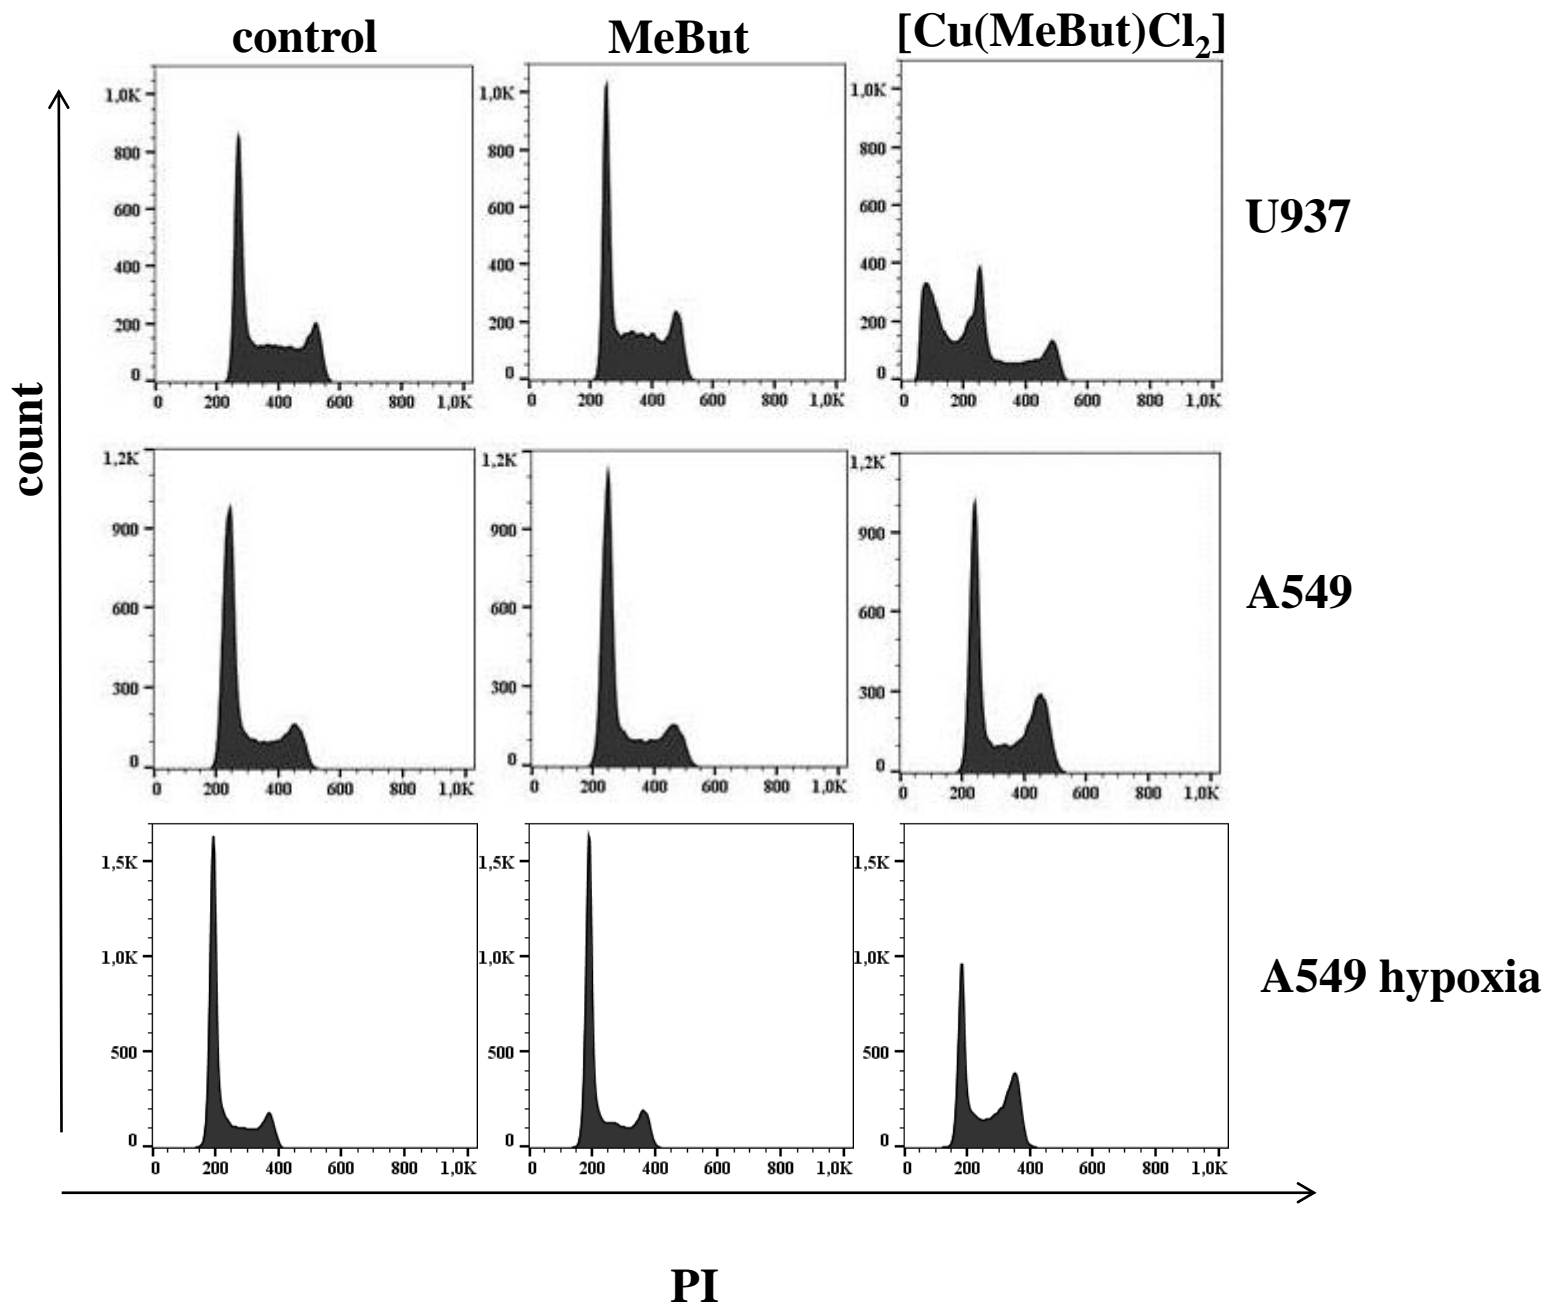

S1 and S2. Cell cycle distribution of cells treated with IC<sub>50</sub> concentrations of ligands and Cu complexes. Monoparametric DNA analysis separate cells into three distinct phases, corresponding to different peaks: G0/G1, S and, G2/M phase.

**Fig S3. ROS (3)**

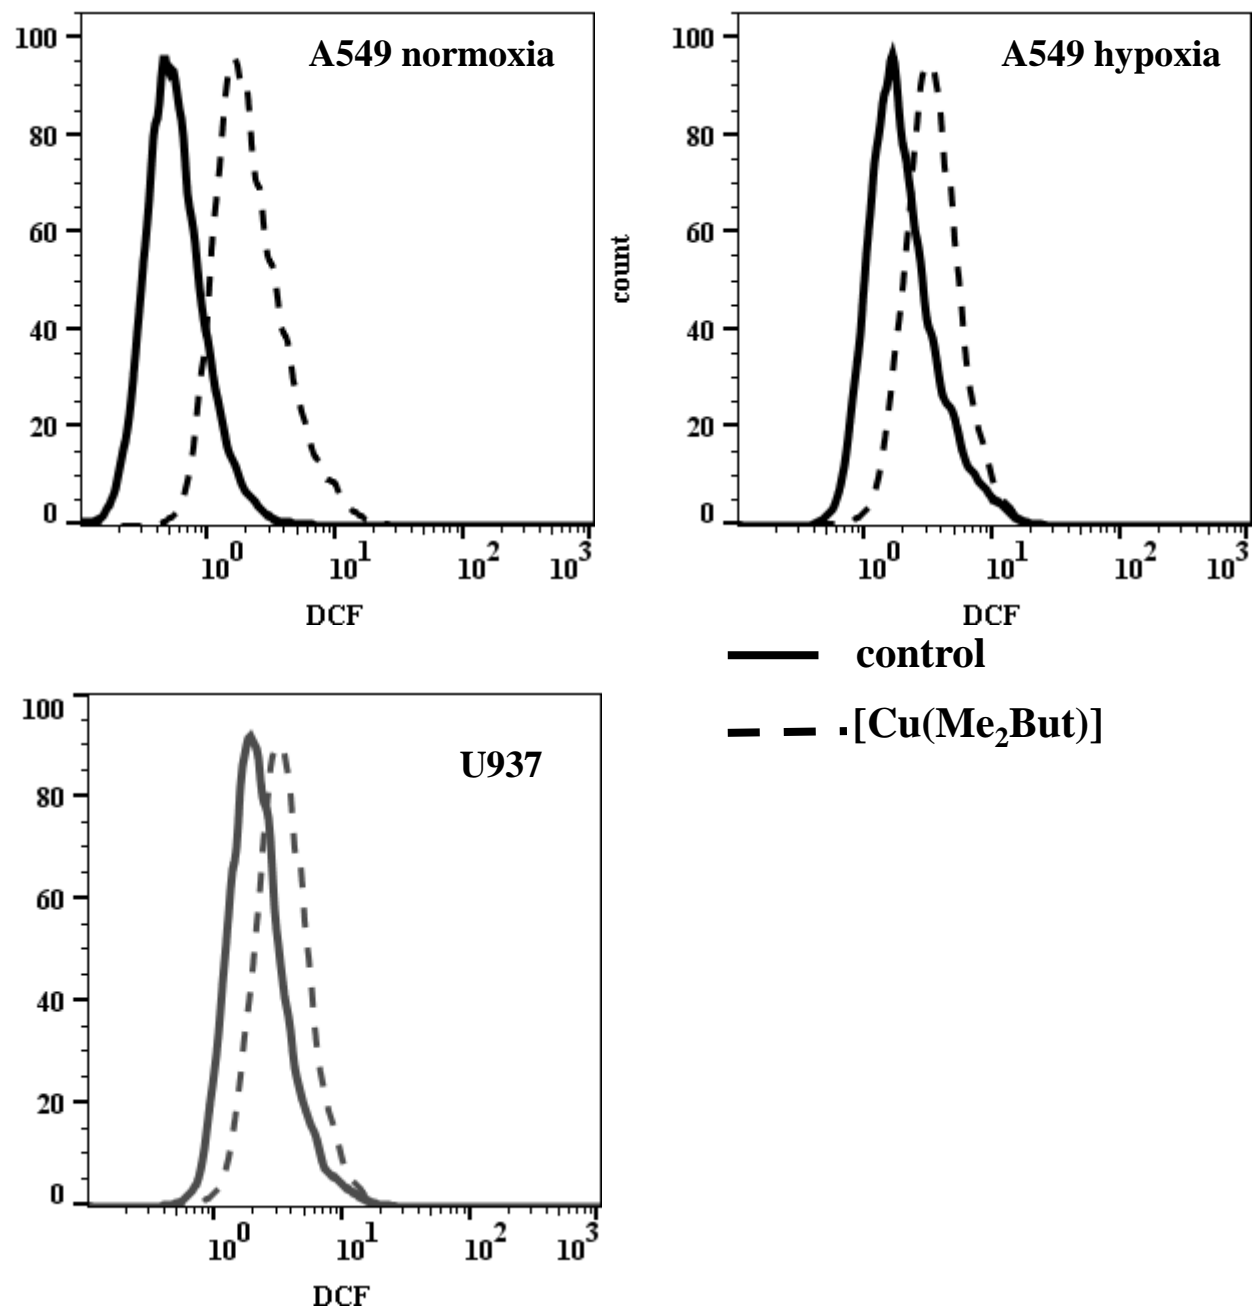

**Fig. S4 (4) ROS**

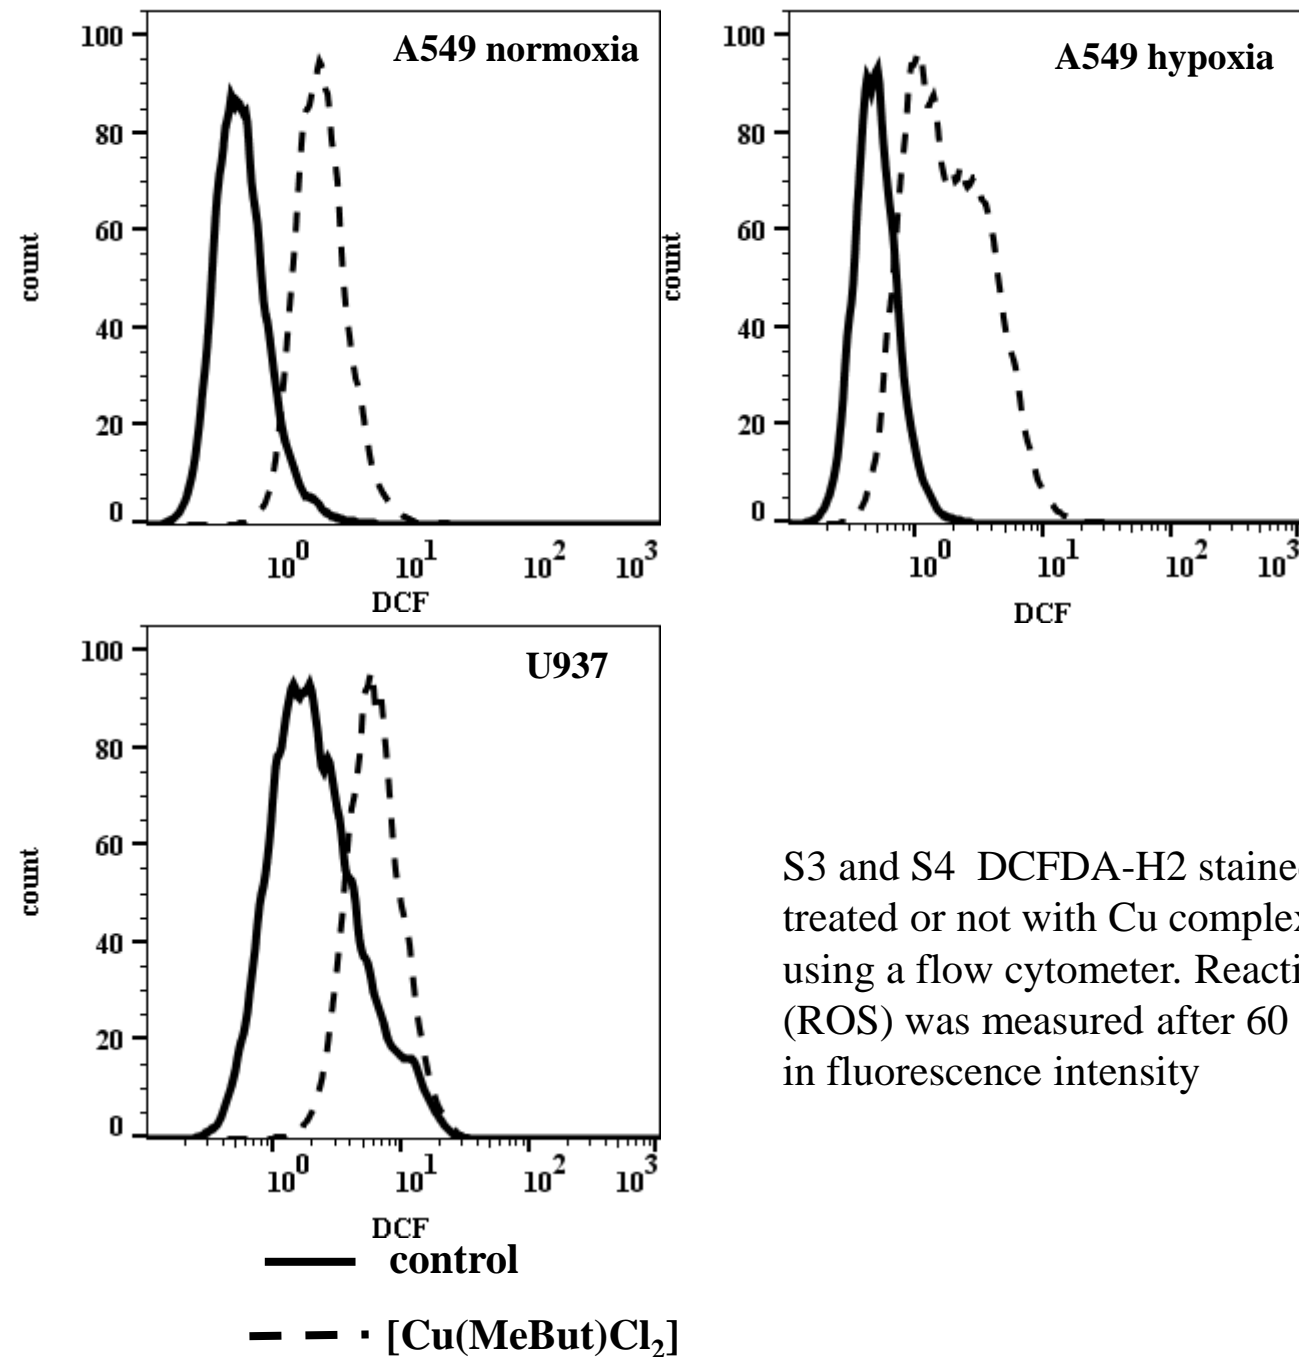

S3 and S4 DCFDA-H2 stained A549 and U937, treated or not with Cu complexes, were analyzed using a flow cytometer. Reactive oxygen species (ROS) was measured after 60 minutes as the increase in fluorescence intensity

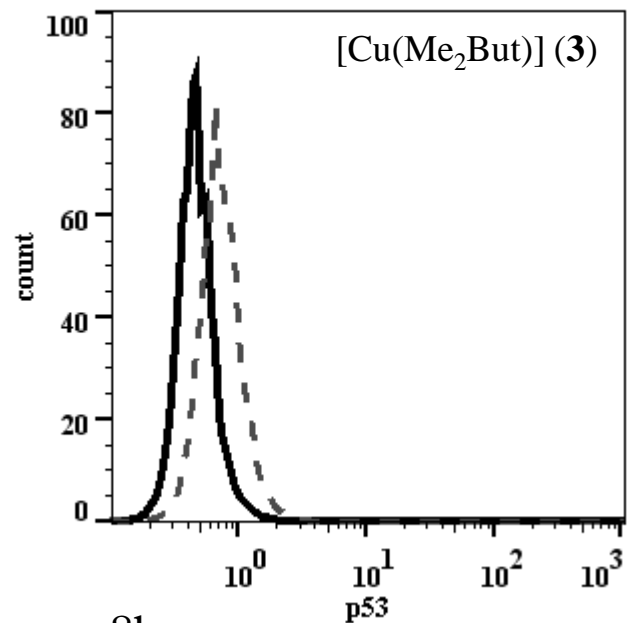

8h

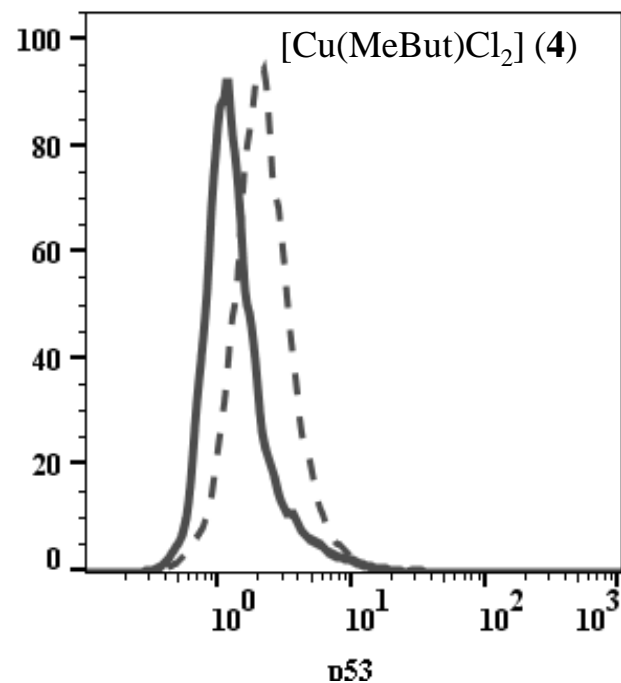

Fig. S5. Flow cytometry-based analysis of p53 expression in A549 cells treated with Cu Complexes. (Control: solid line; 8 h treated cells: dashed line).
